# Supplementary material for: Ice cores from the Allan Hills, Antarctica show relatively stable atmospheric CO2 and CH4 levels over the last 3 million years
Source: Research Square preprint supplement (doi:10.21203/rs.3.rs-5610566/v1), 2024-12-23
Supplement: Supplementary file 1 [file 0e2a5515048724d700eb57fb.xlsx]

## Sheet: Read me
Abstract	Snapshots of carbon dioxide and methane concentrations from ALHIC1901 and ALHIC1503 cores from the Allan Hills, Antarctica. Snapshots range in age from 400,000 to 4 million years old, and are
Contributing authors
	Marks Peterson, J.
	Kalk, M.
	Shackleton, S.
	Hishamunda, V.
	Severinghaus, J.
Age	Atmospheric 40Ar geochronometer (Bender et al. 2008), ka, published in Shackleton et al. 2024
CO2	Concentrations of carbon dioxide (Ahn et al. 2009), ppm, blank corrected and corrected for gravitational fractionation using δ15N
CH4	Concentrations of methane (Mitchell et al. 2011), ppb, blank and solubility corrected, and corrected for graviatational fractionation using δ15N
TAC	Total air content (Epifanio et al. 2023), cc STP/g, corrected for solubility and the cut-bubble effect (Epifanio et al. 2023)
δO2/N2	Difference in the ratio of oxygen to nitrogen relative to present-day (Sowers et al. 1989), permil, corrected for secular decline in atmospheric O2/N2 starting at ~1 Ma (Stolper et al. 2016, Yan et al. 2021)
δ18Oatm	Stable isotope ratio of 18O/16O of molecular oxygen (Sowers et al. 1989), permil, corrected for gravitational fractionation using δ15N and gas loss using δO2/N2 and δAr/N2
δ15N	Stable isotope ratio of 15N/14N of molecular nitrogen (Sowers et al. 1989), permil

## Sheet: Data
Ice Core	Top Depth	Age	CO2 single	CO2 replicate	CO2 replicate	CO2 mean	CH4 single	CH4 replicate	CH4 replicate	CH4 replicate	CH4 mean	TAC single	TAC replicate	TAC replicate	TAC replicate	TAC mean	δO2/N2	δ18Oatm	δ15N	Excluded from pristine dataset?	CO2 from δ13C method single	CO2 from δ13C method replicate	CO2 from δ13C method mean	δ13C single	δ13C replicate	δ13C mean	Corrected CO2 mean	Corrected CO2 high	Corrected CO2 low
	m	ka	ppm	ppm	ppm	ppm	ppb	ppb	ppb	ppb	ppb	cc STP/g	cc STP/g	cc STP/g	cc STP/g	cc STP/g	permil	permil	permil		ppm	ppm	permil	permil	permil	permil	ppm	ppm	ppm
ALHIC1901	121.925	456.035	230.516			230.516	467.926				467.926	0.0826765				0.0826765
ALHIC1901	123.3	558.463	224.679			224.679	461.127				461.127	0.0641376				0.0641376
ALHIC1901	124.88	826.536	271.638			271.638	526.984				526.984	0.109057				0.109057				YES	273.573		273.573	-7.922		-7.922	253.873	260.136	247.324
ALHIC1901	130.655	677.639	293.455			293.455	527.458				527.458	0.103408				0.103408				YES	293.158		293.158	-8.071		-8.071	270.682	277.45	263.606
ALHIC1901	132.33	872.556	259.896			259.896	570.342				570.342	0.112523				0.112523				YES	261.399		261.399	-7.624		-7.624	246.062	251.973	239.881
ALHIC1901	133.61	800.274	263.487			263.487	492.144				492.144	0.0926596				0.0926596				YES	270.294		270.294	-7.873		-7.873	251.646	257.828	245.183
ALHIC1901	134.465	857.814	235.21	236.106		235.658	451	459.259			455.13	0.0804186	0.0824066			0.0814126	-7.63917	0.159786	0.0777536
ALHIC1901	135.195	781.213	249.149	249.706		249.427	522.617	505.801			514.209	0.0597948	0.0758701			0.0678324	-10.0077	0.0628202	0.0910141
ALHIC1901	136.185	776.229	248.991	252.933		250.962	489.436	494.904			492.17	0.0777448	0.0800923			0.0789186	-9.54283	0.138182	0.074588
ALHIC1901	136.575	705.239	256.565	251.725		254.145	463.92	497.677			480.798	0.0840593	0.0842635			0.0841614	-8.6476	0.175301	0.071539
ALHIC1901	136.915	833.361	263.513	260.326		261.919	488.668	471.086			479.877	0.0776615	0.0620896			0.0698755	-12.3667	0.179457	0.0900887		262.18		262.18	-7.06723		-7.06723
ALHIC1901	137.515	770.304	253.046	257.033		255.04	495.093	485.3			490.196	0.0809028	0.08635			0.0836264	-10.4211	0.161288	0.0814335
ALHIC1901	139.085	634.259	262.69	263.381		263.036	536.947	597.088	600.375		578.137	0.103136	0.108801	0.103639		0.105192		0.26768
ALHIC1901	139.305	648.566	253.728	256.872		255.3	592.926	602.694			597.81	0.0994924	0.0995799			0.0995361	-3.08438	0.192114	0.0747729
ALHIC1901	139.635	668.089	267.373	269.843		268.608	596.661	601.148			598.904	0.0967857	0.0899324			0.0933591	-4.62956	0.348687	0.0827133		256.167		256.167	-6.85956		-6.85956
ALHIC1901	139.835	714.597	261.804	264.632		263.218	611.844	611.747			611.796	0.103617	0.102033			0.102825	-3.03871	0.275229	0.0813424
ALHIC1901	140.075	628.321	259.245	259.888		259.567	594.525	615.987			605.256	0.102402	0.101175			0.101789	-6.06619	0.201154	0.0878807
ALHIC1901	140.345	604.11	253.401	243.601		248.501	508.012	497.125	526.499	535.432	516.767	0.105195	0.106222	0.0974327	0.0976997	0.101637	-11.2635	0.232018	0.0717739					-6.34966		-6.34966
ALHIC1901	140.535	525.43	243.47	246.452		244.961	516.838	514.982			515.91	0.100151	0.105966			0.103058	-11.6053	0.259126	0.0692902
ALHIC1901	140.585	676.031	244.425	247.245		245.835	534.148	515.308			524.728	0.105247	0.108117			0.106682	-12.0262	0.252303	0.0668091
ALHIC1901	140.825	608.186	242.511	241.379		241.945	551.646	546.882			549.264	0.0986413	0.0986689			0.0986551	-13.0783	0.280704	0.0615455		240.094		240.094	-6.82785		-6.82785
ALHIC1901	140.955	544.574	252.547	250.261		251.404	523.129	532.287			527.708	0.0978712	0.0966147			0.0972429	-6.87149	0.279827	0.0723023
ALHIC1901	141.365	662.47	244.311	251.106		247.708	586.336	558.508			572.422	0.096369	0.0993555			0.0978623	-7.92483	0.253843	0.0784066
ALHIC1901	141.625	875.933	291.454	289.527		290.491	496.668	498.05			497.359	0.107232	0.105083			0.106158	-9.93861	0.195534	0.0809362	YES	283.153		283.153	-9.01576		-9.01576	252.407	259.276	245.226
ALHIC1901	141.865	1143.46	228.13			228.13	446.424	507.774			477.099	0.109406	0.0972309			0.103319	-11.4165	0.137596	0.0752381
ALHIC1901	142.225	817.582	224.866	223.291		224.078	463.096	466.975			465.035	0.10127	0.102354			0.101812	-9.45387	0.161277	0.0752381
ALHIC1901	142.475	833.101	227.86			227.86	486.434	495.994			491.214	0.110588	0.0821412			0.0963646	-23.8523	0.150148	0.0699905
ALHIC1901	143.025	773.251	230.721	227.201		228.961	491.932				491.932	0.107283				0.107283		0.143362
ALHIC1901	143.63	2299.2	223.307				511.375				511.375	0.0977721				0.0977721
ALHIC1901	143.745	941.428	211.333	222.917		217.125	496.725				496.725	0.102131				0.102131		0.0965414
ALHIC1901	143.785	1277.07	219.044			219.044	503.671				503.671	0.0965164				0.0965164
ALHIC1901	144.285	1043.49	236.393	239.287		237.84	545.895	504.25			525.073	0.104976	0.104638			0.104807	-13.1801	0.102337	0.0932577
ALHIC1901	144.415	1429.49	230.528	226.321		228.424	490.43	485.744			488.087	0.0993728	0.104791			0.102082	-15.7689	0.0988916	0.0900653
ALHIC1901	144.545	2255.4	233.564			233.564	502.326	496.8			499.563	0.0957062	0.0958998			0.095803
ALHIC1901	144.845	1623.71	227.846	229.768		228.807	504.848	508.279			506.563	0.0959476	0.0939196			0.0949336	-11.4268	0.0107521	0.0923279		228.402		228.402	-6.14833		-6.14833
ALHIC1901	145.065	1811.2					503.188	500.159			501.674	0.102517	0.0986755			0.100596
ALHIC1901	145.125	1647.22	231.026	229.033		230.029	497	495.65	496.182		496.277	0.0994286	0.0920077	0.100413		0.0972832	-11.3535	0.0308346	0.0921732		227.54		227.54	-6.36317		-6.36317
ALHIC1901	145.255	1232	219.172			219.172	495.827	489.966			492.897	0.0979073	0.104178			0.101043
ALHIC1901	145.365	1309.56	226.083	226.164		226.123	496.488	504.59			500.539	0.0984498	0.101598			0.100024	-11.4345	0.0616534	0.0907129
ALHIC1901	146.105	680.437	216.88	217.924		217.402	492.142	497.034			494.588	0.0989998	0.0990097			0.0990048	-8.27396	0.208118	0.0914303
ALHIC1901	147.205	551.8	221.581	223.021		222.301	480.352	495.642	475.168	477.748	482.228	0.103388	0.102006	0.0990343	0.101508	0.101484	-10.7832	0.255174	0.0958502
ALHIC1901	147.505	578.965	230.18	235.628		232.904	506.57	508.814			507.692	0.103677	0.0983703			0.101023	-6.72255	0.225573	0.100819
ALHIC1901	147.665	800.271	231.614	230.506		231.06	513.786	520.541	511.013	511.709	514.262	0.104762	0.105343	0.0985689	0.0986828	0.101839	-12.8041		0.0876023
ALHIC1901	147.805	601.453	225.905	225.77		225.837	504.204	500.41			502.307	0.102719	0.105324			0.104022	-8.89431	0.249201	0.0990343
ALHIC1901	148.42	2867.67	250.632			250.632	504.353				504.353	0.101165				0.101165
ALHIC1901	148.435	2674.51	248.212	248.699		248.455	510.876				510.876	0.0998535				0.0998535	-29.2073	-0.106168	0.112025		247.784		247.784	-6.84503		-6.84503
ALHIC1901	148.645	2015.6	244.183	246.491		245.337	519.576	515.008			517.292	0.0864329	0.0916638			0.0890484	-26.5039	0.0319355	0.0942777
ALHIC1901	148.735	1750.9	236.308	238.095		237.201	507.841	509.173			508.507	0.0931105	0.0961656			0.0946381
ALHIC1901	148.815	1983.72	238.393	239.678		239.035	503.794	509.001			506.397	0.103153	0.0856771			0.0944149	-20.705		0.098646
ALHIC1901	148.865	2144.4	222.409	235.219		228.814	513.621	507.659			510.64	0.0961658	0.0936324			0.0948991
ALHIC1901	149.055	2043.7	236.062	238.806		237.434	508.72	507.204			507.962	0.0954703	0.0898767			0.0926735
ALHIC1901	149.315	1861.9	227.383	231.15		229.266	511.303	510.776			511.04	0.0880979	0.0900235			0.0890607
ALHIC1901	149.415	2080.42	236.759	234.858		235.808	513.13	499.881			506.506	0.09503	0.0950256			0.0950278	-18.1808	0.0101832	0.0927519		236.137		236.137	-6.13074		-6.13074
ALHIC1901	149.685	1083.91	222.907	223.866	219.9	222.224	510.246	502.532			506.389	0.101373	0.0998753			0.100624	-13.9577	0.155999	0.0863921
ALHIC1901	150.195	958.538	222.789	224.479		223.634	521.97	517.637			519.804	0.100873	0.0832305			0.0920516	-9.50695	0.177546	0.0870543
ALHIC1901	150.945	1157.83	234.321	236.236		235.279	540.793	528.214	503.454	501.659	518.53	0.0780546	0.0786174	0.0970554	0.0997252	0.0883632	-12.4287	0.142191	0.0984759
ALHIC1901	151.155	558.216	220.429	222.904		221.667	512.146	502.386			507.266	0.0818906	0.083918			0.0829043	-6.37734	0.198409	0.109656
ALHIC1901	151.255	678.337	218.303	226.382		222.342	493.472	496.77			495.121	0.0982813	0.0986269			0.0984541	-16.7541	0.213002	0.106129
ALHIC1901	151.945	2008.88	267.617	269.545		268.581	530.872				530.872	0.10571				0.10571	-26.6202	0.107794	0.0779668	YES	272.015		272.015	-9.33797		-9.33797	238.706	245.393	231.715
ALHIC1901	152.265	1507.18	523.6	585.969		554.785	543.923	526.969			535.446	0.101647	0.105583			0.103615	-37.9942	0.201906	0.0618313
ALHIC1901	152.665	1847.39	658.478	657.724		658.101	533.648	532.682			533.165	0.103703	0.100647			0.102175	-38.5889	0.144028	0.0714509	YES	580.481		580.481	-18.0625		-18.0625	282.816	301.963	262.798
ALHIC1901	153.035	2606.48					551.168	557.562			554.365	0.100927	0.0918348			0.0963811				YES	515.055		515.055	-15.509		-15.509	307.595	323.212	291.267
ALHIC1901	153.87	898.581					519.649	521.763			520.706	0.111204	0.101799			0.106502					230.906		230.906	-6.531		-6.531
ALHIC1901	154.665	846.268	325.53	342.954	337.05	335.178	526.473	521.892			524.183	0.100739	0.105665			0.103202	-4.87274	0.140873	0.0749789	YES	347.994		347.994	-8.98498		-8.98498	310.517	318.944	301.708
ALHIC1901	154.755	891.048	316.418	307.931		312.174	519.4	514.094			516.747	0.107389	0.103508			0.105448	-8.68423	0.20876	0.0750578	YES	307.534		307.534	-8.84806		-8.84806	276.368	283.776	268.623
ALHIC1901	154.845	1163.22					517.426				517.426	0.102821				0.102821				YES	346.342		346.342	-12.148		-12.148	257.648	267.004	247.868
ALHIC1901	154.955	1374.87					535.73	551.581			543.655	0.0812335	0.0877243			0.0844789				YES	544.546		544.546	-18.093		-18.093	262.738	280.591	244.072
ALHIC1901	155.345	1602.95					553.303	556.002			554.653	0.0828534	0.0927594			0.0878064				YES	678.141		678.141	-21.8319		-21.8319	215.338	240.045	189.508
ALHIC1901	155.575	1871.76					604.999	601.144			603.071	0.106318	0.104984			0.105651				YES	1229.89		1229.89	-24.754		-24.754	231.926	280.319	181.333
ALHIC1901	155.69	1926.66																		YES	1222.38		1222.38	-24.753		-24.753	230.848	279.004	180.504
ALHIC1901	155.885	1871.43					578.868	574.593			576.73	0.103092	0.100671			0.101882				YES	1234.35		1234.35	-24.641		-24.641	238.873	287.289	188.257
ALHIC1901	156.5	1521.3					541.067	541.779			541.423	0.108266	0.103472			0.105869
ALHIC1901	156.81	1674.49					574.973				574.973	0.101886				0.101886
ALHIC1901	157.075	1712.38					565.84				565.84	0.106835				0.106835				YES	747.229		747.229	-21.025		-21.025	264.073	290.725	236.21
ALHIC1901	157.175	1833.23	874.87	865.591		870.231	588.163				588.163	0.102073				0.102073	-39.3851	0.144556	0.0659571	YES	827.299		827.299	-21.22		-21.22	286.584	316.389	255.424
ALHIC1901	157.335	1384.29	466.709			466.709	584.615				584.615	0.0857243				0.0857243
ALHIC1901	157.58	2206.76					583.317				583.317	0.106727				0.106727				YES	837.708		837.708	-22.868		-22.868	227.839	259.234	195.018
ALHIC1901	158.745	2684.4	974.914	972.992		973.953	1288.15				1288.15	0.0987903				0.0987903	-93.6026	-0.0248138	0.100087	YES	951.635	950.676	951.155	-23.4921	-23.5181	-23.5051	233.239	269.595	195.232
ALHIC1901	158.8	2848.48					733.834				733.834	0.100543				0.100543
ALHIC1901	158.895	3064.98	1312.42	1392.23		1352.32	1228.61				1228.61	0.102694				0.102694	-113.16	0.109748	0.121329	YES	1057.11		1057.11	-23.8063		-23.8063	244.617	285.375	202.007
ALHIC1901	159.295	2765.33	1442.78	1441.31	1447.56	1443.89	679.221				679.221	0.0996015				0.0996015	-304.122	0.518737	0.0665409	YES	1384.81		1384.81	-24.9575		-24.9575	249.174	304.056	191.797
ALHIC1901	159.675	3987.7	1201.65	1258.74		1230.19	13628.2				13628.2	0.0952819				0.0952819	-485.867	-1.15307	0.0890111	YES	1226.12		1226.12	-25.342		-25.342
ALHIC1503	126.47	852.443									454.7
ALHIC1503	126.535	845.622				240.79
ALHIC1503	126.64	834.604															-10.714	0.159	0.066
ALHIC1503	126.78	819.913									463.09
ALHIC1503	126.845	813.093				245.91
ALHIC1503	126.96	801.025															-11.299	0.204	0.063
ALHIC1503	127.715	780.128				250.81
ALHIC1503	127.78	780.598									469.84
ALHIC1503	127.845	781.068				253.62
ALHIC1503	127.96	781.9															-8.25	0.178	0.073
ALHIC1503	128.56	783.105									551.16
ALHIC1503	128.625	789.769				253.83
ALHIC1503	128.74	805.133															-6.798	0.168	0.063
ALHIC1503	129.27	791.205									597.27
ALHIC1503	129.335	784.374				260.96
ALHIC1503	129.95	730.501									572.31
ALHIC1503	130.015	725.278				256.23
ALHIC1503	130.13	716.037															-7.259	0.202	0.103
ALHIC1503	130.435	691.527				258.89
ALHIC1503	130.465	689.117															-8.693	0.285	0.077
ALHIC1503	130.625	676.259				265.7																				-6.999
ALHIC1503	130.73	667.822									591.89
ALHIC1503	130.795	662.599				255.28
ALHIC1503	130.92	652.554															-5.825	0.224	0.08
ALHIC1503	131.055	641.705				241.95
ALHIC1503	131.165	668.508															-11.444	0.332	0.079
ALHIC1503	131.625	668.769				264.64
ALHIC1503	131.69	663.446									546.26
ALHIC1503	131.755	659.033				214.32
ALHIC1503	131.87	648.684															-7.292	0.2	0.066
ALHIC1503	132.75	873.734									470.31
ALHIC1503	132.815	882.557				231.76
ALHIC1503	132.93	898.168															-11.373	0.142	0.081
ALHIC1503	133.1	921.848				228.53																				-6.153
ALHIC1503	133.18	933.352									510.7
ALHIC1503	133.245	942.698				229.95
ALHIC1503	133.36	959.234															-8.166	0.134	0.056
ALHIC1503	133.595	993.025				227.49
ALHIC1503	133.625	997.339															-14.104	0.178	0.092
ALHIC1503	133.84	1020.26									489.01
ALHIC1503	133.905	1024.13				225.99
ALHIC1503	134.02	1030.99															-7.71	0.14	0.082
ALHIC1503	134.55	1490.88									495.4
ALHIC1503	134.615	1518.85				230.46
ALHIC1503	134.73	1568.34															-9.926	0.157	0.095
ALHIC1503	134.865	1619.45				221.23
ALHIC1503	134.895	1621.89															-12.887	0.142	0.084
ALHIC1503	135.105	1638.99				225.32
ALHIC1503	135.23	1491.38															-6.983	0.208	0.097
ALHIC1503	135.49	1191.96									456.69
ALHIC1503	135.555	1136.03				216.97
ALHIC1503	135.67	1037.08															-4.615	0.171	0.095
ALHIC1503	135.815	912.324				218.78
ALHIC1503	135.92	821.98															-11.635	0.26	0.071
ALHIC1503	136.04	718.731									502.42
ALHIC1503	136.105	662.804				225.84
ALHIC1503	136.22	650.892															-8.979	0.177	0.086
ALHIC1503	136.365	635.872				219.54
ALHIC1503	136.445	627.586															-10.976	0.275	0.107
ALHIC1503	136.615	609.977				219.71
ALHIC1503	136.735	597.547															-9.806	0.214	0.098
ALHIC1503	136.85	585.635									510.82
ALHIC1503	136.915	578.902				225.44
ALHIC1503	137.03	566.99															-14.253	0.19	0.095
ALHIC1503	137.595	697.912				228.96																				-6.602
ALHIC1503	137.67	785.259									487.64
ALHIC1503	137.742	692.568				221.37
ALHIC1503	137.85	759.344															-4.897	0.104	0.072
ALHIC1503	138.005	1268.71				227.24
ALHIC1503	138.045	1400.16															-6.822	0.15	0.087
ALHIC1503	138.17	1810.94									500.35
ALHIC1503	138.235	2024.54				227.25
ALHIC1503	138.35	2402.46															-7.429	0.104	0.058
ALHIC1503	138.91	2017.28									513.79
ALHIC1503	138.975	2035.27				227.05
ALHIC1503	139.09	745.377															-7.844	0.213	0.101
